# Supplementary material for: Trends in drug resistance codons in Plasmodium falciparum dihydrofolate reductase and dihydropteroate synthase genes in Kenyan parasites from 2008 to 2012
Source: PubMed Central journal article supplement (PMC4094641; doi:10.1186/1475-2875-13-250), 2014-07-02
Supplement: 1475-2875-13-250-S3.pdf [file 1475-2875-13-250-S3.pdf]

**Additional File 3:** Prevalence of Pfdhfr/Pfdhps combined mutations per site (SITE MUTATION/SITE TOTAL\*100)

| COMBINED DHFR-DHPS MUTATIONS (MUTANT CODONS UNDERLINED) |        |       |          |        |      |
|---------------------------------------------------------|--------|-------|----------|--------|------|
| ALL SITES                                               |        |       | PER SITE |        |      |
|                                                         | COUNTS | %     |          | COUNTS | %    |
| <u>51/59/108/164/436/437/540/581</u> QUADRUPLE          | 1      | 0.26  | KDH      | 0      | 0.0  |
|                                                         |        |       | KSI      | 0      | 0.0  |
|                                                         |        |       | KCH      | 0      | 0.0  |
|                                                         |        |       | MDH      | 1      | 1.2  |
| <u>51/59/108/164/436/437/540/581</u> SEXTUPLE           | 1      | 0.26  | KDH      | 1      | 0.6  |
|                                                         |        |       | KSI      | 0      | 0.0  |
|                                                         |        |       | KCH      | 0      | 0.0  |
|                                                         |        |       | MDH      | 0      | 0.0  |
| <u>51/59/108/164/436/437/540/581</u> QUINTUPLE          | 2      | 0.52  | KDH      | 1      | 0.6  |
|                                                         |        |       | KSI      | 1      | 1.6  |
|                                                         |        |       | KCH      | 0      | 0.0  |
|                                                         |        |       | MDH      | 0      | 0.0  |
| <u>51/59/108/164/436/437/540/581</u> QUADRUPLE          | 3      | 0.78  | KDH      | 0      | 0.0  |
|                                                         |        |       | KSI      | 0      | 0.0  |
|                                                         |        |       | KCH      | 0      | 0.0  |
|                                                         |        |       | MDH      | 3      | 3.7  |
| <u>51/59/108/164/436/437/540/581</u> QUINTUPLE          | 3      | 0.78  | KDH      | 3      | 1.7  |
|                                                         |        |       | KSI      | 0      | 0.0  |
|                                                         |        |       | KCH      | 0      | 0.0  |
|                                                         |        |       | MDH      | 0      | 0.0  |
| <u>51/59/108/164/436/437/540/581</u> QUINTUPLE          | 6      | 1.55  | KDH      | 5      | 2.9  |
|                                                         |        |       | KSI      | 1      | 1.6  |
|                                                         |        |       | KCH      | 0      | 0.0  |
|                                                         |        |       | MDH      | 0      | 0.0  |
| <u>51/59/108/164/436/437/540/581</u> QUADRUPLE          | 19     | 4.91  | KDH      | 9      | 5.1  |
|                                                         |        |       | KSI      | 8      | 12.5 |
|                                                         |        |       | KCH      | 0      | 0.0  |
|                                                         |        |       | MDH      | 2      | 2.5  |
| <u>51/59/108/164/436/437/540/581</u> QUINTUPLE          | 293    | 75.71 | KDH      | 141    | 80.6 |
|                                                         |        |       | KSI      | 48     | 75.0 |
|                                                         |        |       | KCH      | 60     | 89.6 |
|                                                         |        |       | MDH      | 44     | 54.3 |
