# Supplementary material for: Trends in drug resistance codons in Plasmodium falciparum dihydrofolate reductase and dihydropteroate synthase genes in Kenyan parasites from 2008 to 2012
Source: PubMed Central journal article supplement (PMC4094641; doi:10.1186/1475-2875-13-250), 2014-07-02
Supplement: 1475-2875-13-250-S4.pdf [file 1475-2875-13-250-S4.pdf]

**Additional file 4: Percentage temporal prevalence of genotypes**

|        |                           | <b>2008</b> | <b>2009</b> | <b>2010</b> | <b>2011</b> | <b>2012</b> |
|--------|---------------------------|-------------|-------------|-------------|-------------|-------------|
| Pfdhfr | <b>NCSI</b>               | 0.0         | 1.1         | 1.3         | 2.9         | 0.0         |
|        | <b><u>N</u>RSI</b>        | 0.0         | 0.0         | 1.3         | 0.0         | 0.0         |
|        | <b><u>I</u>RSI</b>        | 0.0         | 0.0         | 0.0         | 1.4         | 0.0         |
|        | <b><u>I</u>RNL</b>        | 0.0         | 0.0         | 0.0         | 0.0         | 1.2         |
|        | <b><u>I</u>CNL</b>        | 3.0         | 0.0         | 0.0         | 0.0         | 0.0         |
|        | <b>NC<u>N</u>I</b>        | 0.0         | 0.0         | 1.3         | 0.0         | 2.4         |
|        | <b><u>N</u>RNI</b>        | 3.0         | 0.0         | 2.6         | 1.4         | 1.2         |
|        | <b><u>I</u>CNI</b>        | 1.5         | 6.6         | 1.3         | 10.1        | 22.9        |
|        | <b><u>I</u>RNI</b>        | 92.5        | 92.3        | 92.2        | 84.1        | 72.3        |
| Pfdhps | <b>SAKA</b>               | 0.0         | 1.1         | 9.1         | 2.9         | 0.0         |
|        | <b><u>A</u>AKA</b>        | 0.0         | 0.0         | 0.0         | 1.4         | 0.0         |
|        | <b>SA<u>E</u>A</b>        | 0.0         | 0.0         | 0.0         | 1.4         | 2.4         |
|        | <b><u>S</u>G<u>K</u>G</b> | 1.5         | 1.1         | 1.3         | 0.0         | 0.0         |
|        | <b><u>A</u>GEA</b>        | 1.5         | 3.3         | 0.0         | 0.0         | 0.0         |
|        | <b><u>S</u>GEG</b>        | 0.0         | 0.0         | 0.0         | 0.0         | 7.2         |
|        | <b><u>S</u>GKA</b>        | 6.0         | 6.6         | 6.5         | 4.3         | 2.4         |
|        | <b><u>S</u>GEA</b>        | 91.0        | 87.9        | 83.1        | 89.9        | 88.0        |
